# Supplementary material for: Context information supports serial dependence of multiple visual objects across memory episodes
Source: Nat Commun. 2020 Apr 22;11:1932. doi: 10.1038/s41467-020-15874-w (PMC7176712; doi:10.1038/s41467-020-15874-w)
Supplement: Supplementary file 4 — Source Data [file 41467_2020_15874_MOESM4_ESM.xlsx]

## Sheet: Figure 2
Distances	Target	Non-Target	Same Color	Different Color	Same Position	Different Position
-180	-0.9149	-1.3893	-0.785	-1.5134	-1.1766	-1.109
-170	0.7639	0.0355	1.1431	-0.3439	0.1981	0.6002
-160	0.4503	0.7701	1.8824	-0.6565	0.0428	1.1751
-150	1.3262	-0.2189	-0.1987	1.3054	0.2039	0.9021
-140	0.2658	-0.5179	-0.3966	0.1437	0.4303	-0.6831
-130	0.2601	-0.4508	0.0818	-0.271	0.0008	-0.189
-120	-0.2562	0.1455	0.4587	-0.5754	-0.3156	0.2015
-110	-0.5682	0.9749	-0.3665	0.7742	-0.4257	0.8314
-100	0.1773	-0.5099	-0.3102	-0.0199	-0.4514	0.1203
-90	1.2563	0.0302	0.6276	0.6537	1.0931	0.1937
-80	0.7888	0.4196	0.7985	0.4098	0.2497	0.9657
-70	-0.2472	-0.4423	-0.1629	-0.5271	-1.1089	0.4174
-60	-1.0849	0.5453	-1.0149	0.4708	-0.6967	0.1483
-50	-0.8885	0.6261	-0.4453	0.1814	-0.2477	-0.0157
-40	-1.5354	0.5291	-1.8913	0.8859	-1.2628	0.258
-30	-3.0307	-0.4542	-2.7956	-0.6879	-1.5526	-1.932
-20	-3.3223	-0.9047	-3.1478	-1.0805	-1.4112	-2.8159
-10	-1.6524	-0.807	-1.2615	-1.2002	-0.878	-1.5836
0	0.3814	-0.3614	0.3822	-0.3579	0.0706	-0.0482
10	1.2623	0.4327	1.0666	0.6318	0.7727	0.9265
20	2.8815	-1.0842	1.7716	0.0269	0.9564	0.845
30	2.5302	0.1417	1.9384	0.7175	1.8849	0.7813
40	3.091	-0.7487	0.6294	1.7108	2.1462	0.194
50	1.0772	0.2239	0.8749	0.4232	0.2728	1.0261
60	0.115	-0.473	0.6318	-0.9889	-0.7407	0.3868
70	-0.5377	-0.5855	0.1774	-1.2979	-0.927	-0.1953
80	-0.2601	-0.0315	-0.7374	0.4396	0.0189	-0.3102
90	-0.2418	-0.0444	0.5029	-0.7894	0.1546	-0.4418
100	0.3634	0.1242	0.7776	-0.2873	0.5068	-0.018
110	-0.6886	1.5584	0.3631	0.5049	0.3188	0.5505
120	0.2213	0.5578	0.2765	0.5035	0.7179	0.0618
130	0.286	0.6915	0.4764	0.4997	-0.0623	1.0401
140	-1.2304	0.5568	-0.2839	-0.3909	0.3271	-1.0023
150	0.0041	-0.266	0.0513	-0.316	0.1127	-0.3738
160	-0.7327	-0.3498	-0.7907	-0.2912	-0.5153	-0.5677
170	-0.9574	0.2074	-0.8473	0.0939	0.3447	-1.0964
180	0.3137	0.289	1.1002	-0.4584	-0.674	1.2703

## Sheet: Figure 3
Distances	Target	Non-Target	Same Color	Different Color	Same Position	Different Position
-180	-0.6998	-0.4022	-0.3737	-0.7241	0.1207	-1.2244
-170	0.7234	0.012	0.4313	0.3042	0.0245	0.71
-160	1.2445	-0.5618	0.3303	0.3507	-0.0945	0.7776
-150	0.3596	-0.5751	-0.6144	0.3983	-0.1288	-0.0858
-140	0.3747	-0.1012	0.6196	-0.3462	0.1654	0.1083
-130	-0.083	-0.0278	0.2404	-0.3481	-0.4268	0.3146
-120	-0.5396	-0.4331	-0.3942	-0.5801	-0.4872	-0.4851
-110	0.0357	-0.6356	-0.7146	0.1152	-0.7837	0.184
-100	-0.0567	-0.6341	-0.6251	-0.0652	-0.4987	-0.1931
-90	-0.5471	-0.351	-0.6234	-0.2733	-0.9567	0.059
-80	0.3569	-0.1871	-0.1808	0.3489	-0.4375	0.6072
-70	-0.548	0.1412	-0.1126	-0.2951	-0.8921	0.4887
-60	-0.9317	0.2395	-0.4991	-0.189	-0.061	-0.6284
-50	-1.4782	0.5509	-0.4342	-0.493	-1.3333	0.4089
-40	-1.9527	0.661	-0.7902	-0.5017	-1.5283	0.2349
-30	-3.1786	-1.0078	-2.4028	-1.7854	-2.4789	-1.709
-20	-3.4354	-0.2098	-2.0134	-1.6291	-1.9612	-1.6838
-10	-2.3665	-0.9575	-1.8399	-1.4867	-1.8516	-1.4735
0	0.3131	0.4336	0.3774	0.3703	0.1423	0.6042
10	2.5993	0.3094	1.4941	1.4146	1.5053	1.4019
20	2.9847	0.4267	1.3567	2.0528	1.7456	1.6658
30	3.4672	0.0481	1.9407	1.5723	2.3914	1.1214
40	2.1178	0.1043	0.9883	1.2289	2.2559	-0.037
50	1.6111	0.2347	1.3542	0.4904	1.6929	0.1513
60	0.0754	0.0411	-0.056	0.1719	0.5844	-0.4674
70	0.5875	-0.2894	0.2361	0.0625	0.1744	0.1254
80	0.0219	-0.7984	-0.5322	-0.2446	0.288	-1.0655
90	0.7629	-0.0942	0.3586	0.3083	0.8765	-0.2111
100	0.3591	0.4058	0.6864	0.0789	0.5193	0.2455
110	0.3011	0.3663	0.5121	0.1537	0.4263	0.2407
120	0.4593	0.1417	-0.5347	1.1349	0.3531	0.2483
130	-0.2116	0.8304	0.0151	0.6034	0.611	0.0094
140	-0.3642	0.6603	0.071	0.2247	-0.0825	0.3767
150	-0.7104	0.659	-0.2101	0.1601	0.0561	-0.1096
160	-0.3339	0.0658	-0.1276	-0.1388	0.0408	-0.308
170	-0.9164	0.7891	-0.0066	-0.1191	0.0862	-0.2122
180	0.6144	-0.4159	-0.2068	0.4046	0.3246	-0.1253

## Sheet: Figure 5 a-c
Distances	Target	Non-Target	Same Color	Different Color	Same Position	Different Position
-180	-0.283	-1.4304	-1.1809	-0.2961	-0.4416	-0.9222
-170	2.0899	-0.8804	0.3567	0.8496	1.6438	-0.4348
-160	3.1515	1.0697	2.3773	1.8419	2.964	1.2545
-150	4.0564	0.2583	1.9629	2.3589	3.2607	1.068
-140	1.5291	-0.8277	0.132	0.5763	0.8441	-0.1443
-130	1.2389	0.1161	1.3236	0.0238	0.7181	0.6319
-120	0.794	-0.4975	-0.0867	0.39	-0.8414	1.1408
-110	0.4945	0.994	0.1291	1.3562	0.8423	0.6584
-100	0.8378	-0.4195	0.0698	0.3553	-0.8362	1.2549
-90	-0.1128	-0.8455	-0.5176	-0.4366	-0.8005	-0.1558
-80	0.0971	1.5024	1.2072	0.4	-0.3636	1.9703
-70	1.332	-0.3049	-0.8078	1.8357	1.2777	-0.2412
-60	-0.5088	-0.0053	-0.8889	0.5071	-2.6304	1.9955
-50	-1.4377	-2.0838	-2.4165	-1.1071	-2.666	-0.8542
-40	-1.73	-0.329	-2.0721	0.0116	-2.1163	0.0522
-30	-2.8092	0.279	-1.9736	-0.5693	-2.2977	-0.241
-20	-2.5671	0.2231	-2.3515	0.0132	-2.4575	0.1283
-10	-2.1123	-0.0513	-1.7656	-0.3975	-1.7031	-0.4602
0	-0.8701	0.5342	0.3807	-0.7145	-1.1397	0.803
10	2.4565	-0.6411	1.7991	0.0276	1.9015	-0.0846
20	2.6208	1.925	1.9219	2.6131	4.5542	-0.0278
30	2.1778	-0.1169	1.6185	0.4359	1.6426	0.4111
40	-0.0245	-0.9442	-0.1498	-0.8194	0.6992	-1.6737
50	0.036	0.3199	1.6803	-1.3229	1.298	-0.9467
60	0.3955	0.2273	1.0355	-0.4151	0.1804	0.441
70	-1.2711	0.3884	0.8279	-1.7132	0.2479	-1.121
80	-1.2611	-0.3636	-0.0802	-1.5444	0.6359	-2.2664
90	-0.6377	1.2973	0.4378	0.2183	0.0906	0.5697
100	-0.3625	0.5964	0.3974	-0.1771	0.8451	-0.6123
110	-1.5387	0.2828	-0.6575	-0.6037	-0.4532	-0.8146
120	-1.0552	0.4833	-0.336	-0.2389	-0.6688	0.1003
130	-0.2068	0.5316	0.234	0.0967	-0.7442	1.0743
140	-2.1213	-0.2522	-0.6352	-1.7513	-0.8144	-1.5673
150	-1.0774	-0.0125	-0.6325	-0.4566	-0.8041	-0.2913
160	-2.0778	0.1892	-0.4275	-1.4571	-1.1327	-0.7606
170	-1.0168	-1.6411	-1.4932	-1.1664	-1.8586	-0.7981
180	1.7957	-0.2148	1.5047	0.0884	-0.7269	2.313

## Sheet: Figure 5 d-f
Distances	Target	Non-Target	Same Color	Different Color	Same Position	Different Position
-180	0.4199	-4.1016	-3.2418	-0.4893	-0.7623	-2.8711
-170	-0.7524	-2.425	-2.312	-0.8573	-1.5608	-1.5407
-160	0.9711	0.7954	1.7173	0.0528	0.5808	1.1863
-150	2.5743	0.386	1.6477	1.3116	2.5521	0.4172
-140	0.5048	-0.3962	0.2251	-0.0962	0.2314	-0.1132
-130	-0.2672	1.9107	-1.281	2.9266	1.1128	0.5582
-120	-0.1528	0.1858	-0.6289	0.656	-1.6036	1.6395
-110	-0.0471	-1.4145	-1.6179	0.1845	-2.5518	1.1474
-100	-0.0071	0.049	-0.6903	0.7648	0.3739	-0.3216
-90	1.3466	2.6814	1.3264	2.6965	0.5799	3.4338
-80	-0.1029	1.7872	0.3373	1.3614	0.239	1.4651
-70	-1.0718	0.0785	-1.8268	0.8371	-0.2448	-0.7582
-60	-2.283	0.2951	-0.0026	-2.0287	0.0333	-2.1006
-50	-0.9153	-1.4614	-2.5995	0.298	-2.7404	0.4297
-40	-2.4737	-0.3094	-1.2483	-1.5423	-3.1234	0.3354
-30	-3.8246	-1.2101	-3.4283	-1.5989	-3.2483	-1.7945
-20	-0.8966	-0.9984	-1.1096	-0.8029	-1.2127	-0.7184
-10	-2.8373	-0.9178	-1.692	-2.0719	-1.992	-1.7685
0	-1.0261	0.4208	0.4674	-1.0897	0.0893	-0.7307
10	0.9092	1.1209	1.2211	0.6476	2.4391	-0.6571
20	3.3403	0.5152	1.2591	2.586	3.2274	0.6138
30	3.0599	1.8539	3.2102	1.631	3.2593	1.5041
40	3.6312	1.4775	1.4816	3.6523	1.4828	3.6239
50	1.4393	-1.2085	0.1221	0.087	0.2542	-0.0553
60	1.1412	0.1318	0.3198	0.9697	0.632	0.6358
70	-1.2753	-2.058	-0.454	-2.8545	-1.4924	-1.8563
80	0.6695	1.1677	0.2578	1.5631	1.7299	0.1061
90	0.7236	0.5956	1.3645	-0.0606	0.5346	0.7027
100	0.6639	-1.1434	-0.6199	0.1133	-0.9437	0.4588
110	-0.7034	0.8016	1.7094	-1.5939	0.1799	-0.0581
120	-1.3684	-0.8233	-1.5793	-0.5975	0.0889	-2.254
130	-1.3499	-0.363	-1.9792	0.2253	0.9671	-2.6403
140	0.6612	0.124	0.8702	-0.0634	1.0622	-0.2494
150	-1.3188	-1.5826	-1.8151	-1.053	-0.7875	-2.0646
160	-2.857	-1.5462	-3.4296	-0.9667	-2.0216	-2.3806
170	-0.5637	0.1993	0.3602	-0.7446	-0.2811	-0.0976
180	4.0022	-1.3837	2.6945	0.0929	2.7059	0.0773

## Sheet: Supp. Table 1 & Supp. Figure 1a
Subject	SameColorSamePositionTarget	SameColorSamePositionNon-Target	SameColorDiffPositionTarget	SameColorDiffPositionNon-Target	DiffColorSamePositionTarget	DiffColorSamePositionNon-Target	DiffColorDiffPositionTarget	DiffColorDiffPositionNon-Target
1	2.16723	2.20588	2.58674	0.812991	0.855122	1.4765	0.572947	0.317142
2	3.29419	0.998608	1.7114	4.5041	0.668297	0.525234	-3.50287	3.41978
3	-1.84184	0.146047	-1.15139	0.846209	-0.986462	0.82706	-1.47854	1.13397
4	-2.42089	1.09683	0.244688	2.26182	2.1478	1.38928	0.911398	0.207177
5	1.48391	4.27559	-0.233884	5.95713	-1.95378	2.13059	-1.80351	1.90991
6	2.65016	1.84989	0.433732	3.40145	0.179907	3.48558	0.924376	0.486628
7	0.509439	3.72021	-0.442354	2.32005	-1.44751	6.66971	-1.24251	4.11342
8	1.31691	1.36105	0.361676	-0.382772	-1.78448	-1.08174	-2.74674	0.306887
9	1.34485	5.71862	1.85281	6.93988	-0.706024	5.7573	-1.83774	8.03636
10	-0.1189	2.11966	-1.84974	2.43134	-1.872	-0.887962	-1.93087	-0.585516
11	-3.51075	3.81811	-2.23311	1.19358	-3.36253	-0.39828	-1.78228	-0.326797
12	-0.283837	0.475763	1.71681	1.61667	-2.8697	-0.575529	-2.03973	0.433904
13	2.23024	2.40133	-0.578606	4.88493	0.823021	4.99512	0.0509629	1.42434
14	0.808364	6.00253	-0.917412	4.02617	1.43606	4.80986	2.79835	5.81274
15	-2.32131	-1.1456	-1.53928	3.49731	-1.15682	2.75474	-2.29396	1.60688
16	0.205209	0.986285	0.825379	2.00936	-1.0851	-1.32306	2.4621	-4.10131
17	-0.103921	3.21629	0.915648	0.498262	-1.36116	0.703611	0.187413	1.82538
18	0.762704	4.04508	0.898439	1.96529	1.99083	2.1492	0.251697	0.58288
19	4.63295	6.63999	2.0245	4.66443	-1.7665	5.46353	1.08832	1.54388
20	2.03271	1.64638	3.59017	-0.378709	1.00707	-1.42912	1.53723	-1.64182

## Sheet: Supp. Table 2 & Supp. Figure 1b
Subject	SameColorSamePositionTarget	SameColorSamePositionNon-Target	SameColorDiffPositionTarget	SameColorDiffPositionNon-Target	DiffColorSamePositionTarget	DiffColorSamePositionNon-Target	DiffColorDiffPositionTarget	DiffColorDiffPositionNon-Target
1	3.19161	1.93876	-0.24784	3.22039	-1.50187	0.720678	-0.669645	0.135335
2	1.31112	4.52914	-1.61434	0.947839	4.88168	3.56805	0.859199	3.97029
3	4.29266	7.02028	-0.508992	4.26343	2.4232	5.28438	-0.881186	2.75828
4	2.84781	2.90437	0.189922	1.81765	-0.335009	3.55867	-0.631992	0.269677
5	0.571259	0.730344	-0.927979	1.122	0.725744	0.349227	-0.632113	1.91967
6	-1.28177	3.78963	0.45114	5.67993	-0.633681	5.4777	1.93761	0.55943
7	1.03204	2.84829	-0.243704	1.75624	4.2077	2.83581	1.63877	0.104495
8	0.318382	5.34968	-1.7092	2.28168	2.38479	6.88513	-1.02586	4.01537
9	2.69628	4.61133	-0.0345406	1.33933	-0.317242	2.61128	1.14361	2.38648
10	0.011023	3.58352	1.44536	0.288818	1.79513	5.2649	-0.150105	0.532456
11	-0.99204	3.15344	1.02635	1.38593	-0.959772	1.66338	-0.0540478	1.66682
12	0.855748	4.83573	-1.95389	5.87934	2.20596	5.48618	0.399655	2.65816
13	2.49452	3.49551	-1.10828	2.38894	-0.113455	-1.77588	-2.38271	-1.08714
14	-0.583451	1.8042	-0.662926	1.7771	-0.34538	0.360857	-3.26536	0.665601
15	1.51674	-0.704561	3.3302	3.11677	-0.710216	-0.599825	0.55467	-0.0319498
16	1.35275	2.5629	-1.47399	2.82538	1.22612	4.2867	-0.755726	2.34293
17	0.506028	-1.19572	3.03922	-4.2754	-1.65754	3.99463	-1.37913	-6.29025
18	2.57539	8.11747	-0.236996	7.18254	3.49367	5.52862	3.38462	2.28626
19	1.1131	1.43247	0.815744	3.88182	2.39883	6.5556	0.97141	5.40097
20	0.0283105	2.56559	-1.94435	1.58876	-0.313814	1.33085	-0.324724	1.19489
21	0.811065	3.34287	3.09637	1.50298	3.45722	4.66627	3.0046	4.86794
22	-0.0162823	4.28162	-2.36946	1.0012	1.8786	4.61356	-5.13425	0.835266
23	0.466499	1.88148	-1.90271	3.52555	-1.89219	0.0250662	-0.231103	0.501858
24	-0.769388	3.9525	0.298153	0.459774	1.41871	3.56572	0.0501181	4.77346
25	0.98462	2.03019	1.84235	1.90067	-0.327899	3.24088	0.675002	-0.985745
26	-0.411216	1.57453	-1.22395	4.4381	-1.0258	4.58531	0.935119	5.87555
27	2.6298	5.02379	2.46539	0.0813863	0.917336	2.06643	2.34354	-1.25085
28	-1.31195	3.30166	-0.575063	4.00169	0.0249411	3.28061	-1.9748	1.83019
29	1.53791	2.91628	-1.28417	1.22804	-0.67696	1.26414	-0.974059	2.21976
30	-1.52559	1.72092	0.261311	1.14519	2.80783	-0.829449	1.77655	-1.65111
31	0.0140906	2.49902	1.56864	4.3018	0.849	2.47432	1.03499	4.04342
32	-0.0573696	2.4616	-0.862068	3.92336	1.20972	2.65622	-0.582857	3.06289
33	1.46485	4.79888	-0.0612053	3.76728	-0.278602	6.41372	0.2226	3.13781
34	0.289554	-0.188099	-1.38253	1.93638	0.775633	0.91683	-0.552597	1.85028
35	-1.5663	0.801336	-2.89884	-1.59588	2.25131	1.79846	-2.27877	0.794147
36	1.97203	2.03677	-1.21732	2.77346	1.1475	0.668715	-0.816368	1.33984
37	0.423175	2.39453	0.227847	-1.00938	-2.93316	-2.15018	-1.86079	-0.54302
38	1.79811	6.32861	2.25603	3.80779	0.849764	0.669179	-2.72073	4.67739
39	1.35718	3.55652	-1.50017	1.24702	4.10491	7.13622	-1.86084	7.46777
40	0.811765	6.2329	-1.49436	-0.416143	0.983152	6.63419	-2.63562	1.72787
41	-3.57858	3.30393	1.69696	2.50251	-1.19009	-0.239937	-1.59734	0.90828
42	1.54727	6.30016	1.75725	2.67974	2.71846	5.2824	0.147848	3.80034
43	1.71153	6.15765	2.06397	4.40875	0.775938	2.00159	-0.955635	2.22815
44	2.99036	1.21286	-0.656594	4.70102	0.147617	0.447492	-1.91204	3.07468
45	-3.16349	2.8805	-0.948824	1.71176	1.15536	6.60838	0.444391	9.63397
46	-0.791445	3.19459	-3.96755	2.64133	1.88014	5.16036	-0.891998	0.636663
47	1.05435	0.874599	0.388969	1.30502	-0.27013	1.68093	-0.272616	-0.821519
48	-0.405188	3.32821	1.61819	0.124923	-0.218467	1.21778	-3.59431	0.776121
49	1.20266	4.62148	-3.21404	4.64018	1.84384	0.958569	1.98735	2.42479

## Sheet: Supp. Table 3 & Supp. Figure 1c
Subject	SameColorSamePositionTarget	SameColorSamePositionNon-Target	SameColorDiffPositionTarget	SameColorDiffPositionNon-Target	DiffColorSamePositionTarget	DiffColorSamePositionNon-Target	DiffColorDiffPositionTarget	DiffColorDiffPositionNon-Target
1	7.25923	3.72346	4.00894	2.6282	1.19897	-1.5976	-1.10521	-0.705274
2	8.62274	4.96062	5.68841	3.35941	-0.579918	3.99577	-5.20413	0.594671
3	4.3431	7.28357	2.5125	3.26706	3.29109	3.32895	-2.12795	3.98744
4	5.25924	2.97966	-3.7843	0.727442	1.32224	4.29432	-4.7756	2.26692
5	1.06386	4.46084	0.874842	-0.934037	-0.421528	3.24723	2.13061	-1.71859
6	-1.80493	1.46071	-2.05852	1.24258	-0.431313	1.60037	-2.07015	1.97671
7	-1.21498	6.95619	1.27833	1.47395	0.734541	3.15672	-1.18182	-3.95766
8	-0.930662	-2.46409	-0.234555	-1.83846	-0.578252	-1.63756	-1.0226	-3.9383
9	1.57461	6.64698	2.32947	-1.62698	0.407817	1.73148	2.68763	-0.549536
10	-2.07017	0.628256	-1.67272	5.58175	0.158708	6.06857	-3.45261	1.70677
11	-0.991713	3.93791	-1.24996	0.819625	-1.05043	2.52955	-1.93157	-2.30211
12	2.74751	7.91464	0.690228	-3.23524	-3.34691	1.25288	-5.18368	-5.03394
13	5.48005	4.12403	-2.73954	-3.78162	0.77833	1.26728	-3.28796	-1.11969
14	0.908749	5.3357	-4.58415	0.118169	-0.104259	2.78223	3.6259	1.54768
15	1.36545	4.9907	2.43957	-0.306372	-0.400701	-1.11801	-1.34357	3.58973
16	8.1506	-1.12956	0.181347	-0.229902	-0.923349	-1.82881	-3.24028	1.62684
17	5.52528	2.90122	1.45213	3.16794	1.2349	9.21811	-0.35523	2.10024
18	1.91284	1.06674	-1.52015	1.06149	3.38137	3.40348	1.0807	0.239704
19	0.203709	0.27957	-2.62031	2.67676	-1.06012	-2.6612	-2.5561	-0.875862
20	2.95343	5.80246	-0.602195	5.06922	1.62942	4.7009	-2.3711	4.86019

## Sheet: Supp. Table 4 & Supp. Figure 1d
Subject	SameColorSamePositionTarget	SameColorSamePositionNon-Target	SameColorDiffPositionTarget	SameColorDiffPositionNon-Target	DiffColorSamePositionTarget	DiffColorSamePositionNon-Target	DiffColorDiffPositionTarget	DiffColorDiffPositionNon-Target
1	2.62299	3.72772	-0.512072	3.11067	-0.357616	2.61537	1.63135	3.82593
2	1.80493	7.80947	-1.71595	2.93872	0.473494	7.29333	3.33281	8.00016
3	3.38997	0.0991818	2.8088	-12.7363	4.28335	-2.34361	1.91007	5.33622
4	1.90076	3.0958	2.06054	3.20701	0.633684	5.96986	-2.03154	-1.44415
5	-1.95886	0.655998	6.46395	4.69069	0.280161	4.17495	1.76441	6.83819
6	4.94972	9.27736	-9.80689	-3.55938	-3.11338	-0.271738	-2.69782	5.24619
7	5.31163	6.14851	0.70734	6.66754	3.95497	7.64477	-1.88843	4.35508
8	3.03603	2.23908	-2.52045	-5.14685	1.48849	4.68149	-0.0926057	-4.79868
9	0.47573	1.85933	-1.85832	0.530953	-2.67694	1.29956	0.517324	4.97195
10	11.1471	4.85304	3.53304	2.23269	0.311822	5.03001	-0.638767	3.51288
11	-2.24404	4.95296	1.9729	1.47522	-2.38786	5.36009	-3.65202	4.15781
12	-3.28271	2.92496	0.685289	1.83597	6.96586	1.76879	-1.07187	0.730302
13	-2.88599	4.95387	1.93215	4.3997	-0.966593	6.05949	-2.17976	11.938
14	-5.86387	0.448483	4.83818	3.18154	5.22567	-2.83622	-0.679903	2.44324
15	4.04131	3.06496	4.63132	-3.02642	-0.661226	3.11996	0.985151	-1.08468
16	2.69403	5.20642	-2.88654	-3.38299	1.48973	-2.58417	-4.47188	-1.29829
17	9.01508	4.40228	-1.06281	3.19147	2.52296	-8.46097	-2.53925	-1.65608
18	2.80871	1.82295	3.50261	4.80915	-0.127284	4.92915	0.442792	0.249894
19	5.50593	10.4182	5.04919	2.05486	4.49619	4.95928	4.17705	1.37875
20	4.79523	0.441767	-5.40281	10.3549	1.07765	4.84966	-3.93455	1.06025

## Sheet: Supp. Table 5 & Supp. Figure 2a
Subject	TargetCurrentS1SameColorPrevS1	TargetCurrentS1SameColorPrevS2	TargetCurrentS1DiffColorPrevS1	TargetCurrentS1DiffColorPrevS2	TargetCurrentS2SameColorPrevS1	TargetCurrentS2SameColorPrevS2	TargetCurrentS2DiffColorPrevS1	TargetCurrentS2DiffColorPrevS2	NonTargetCurrentS1SameColorPrevS1	NonTargetCurrentS1SameColorPrevS2	NonTargetCurrentS1DiffColorPrevS1	NonTargetCurrentS1DiffColorPrevS2	NonTargetCurrentS2SameColorPrevS1	NonTargetCurrentS2SameColorPrevS2	NonTargetCurrentS2DiffColorPrevS1	NonTargetCurrentS2DiffColorPrevS2
1	4.83782	4.2382	1.29979	0.266912	1.00238	-0.239602	0.459913	0.109191	2.65362	0.486991	-0.327551	-0.279653	1.33819	1.15028	-0.405286	3.17228
2	1.67347	3.19226	-0.647022	-0.2902	0.285137	4.66706	-6.96224	1.69667	2.50084	5.94698	2.34578	5.56218	2.16168	-0.683553	0.242094	-0.944135
3	-3.72769	-1.51699	0.32331	-1.12684	-0.370982	0.344537	-2.66247	-1.79847	-0.305141	1.91413	0.778743	3.54839	-0.820808	1.17417	-1.00121	1.09781
4	-4.17103	-1.50305	2.61261	-0.689608	1.19713	-0.634329	2.05806	1.06092	2.16748	3.89126	3.11865	0.743884	1.43462	0.21521	-0.362039	0.0771566
5	2.15894	-2.54938	-5.24147	-2.29271	2.40276	1.04863	-2.84742	0.325982	8.15993	5.64996	3.2587	-0.427884	5.48365	2.03279	2.0087	0.767477
6	2.32933	-1.01179	-2.95266	0.689799	2.0977	2.98597	0.992964	4.72345	1.86428	1.67021	5.6783	-0.0189528	4.07472	2.73112	0.892655	2.26356
7	0.697214	2.06608	-0.352505	-1.04499	-3.36146	0.516515	-1.73565	-2.66208	5.65255	6.54006	10.2758	5.31127	0.628642	2.71504	2.53853	3.67443
8	1.08651	-1.53638	-1.23594	-3.44152	2.27326	2.07453	-2.74364	-2.7738	0.0419737	-0.821514	-2.01126	-0.0817358	0.0729936	2.47807	0.598888	-0.365917
9	4.78333	0.290044	0.0923918	-3.8919	2.53994	-0.366586	-1.16124	-2.19546	10.3954	10.4679	7.32008	11.8729	3.31616	1.36696	4.31988	3.77459
10	-2.44425	-2.05533	-1.46591	-0.934347	-1.64997	0.860786	-2.97941	-2.56372	2.74675	1.14877	-1.27996	0.463997	3.80457	1.85971	-0.315102	-1.32206
11	-3.1983	-1.97521	-4.92845	-1.30469	-2.2185	-3.64207	-2.65239	-2.79241	2.92741	2.19295	-2.11833	-0.39554	0.578415	4.85509	0.160273	1.23531
12	-0.0224035	2.41489	-4.61519	-0.594356	1.19065	-1.4089	-4.08633	-1.839	-0.17522	3.98687	-2.17591	-3.11309	-0.963779	1.72829	4.75956	0.603674
13	-2.25576	-3.03744	-0.0556294	-1.31148	1.09506	6.52191	1.47057	2.35482	3.5979	6.47533	8.09079	-0.503468	3.19587	-0.412224	2.82488	2.11984
14	0.642017	-1.59506	1.12673	2.60204	-1.09255	0.408849	2.59733	1.5246	8.92521	6.39398	6.79172	7.85543	0.316934	2.09459	3.36556	3.31417
15	-1.85842	-0.800519	-4.74607	-2.7714	-2.2151	-3.2232	-2.62563	0.562226	-2.35481	1.28081	-0.387512	1.17915	6.22423	-0.583774	1.44593	4.17986
16	-0.470623	-4.77749	-2.21686	2.08035	5.73849	3.81724	2.02199	0.800321	-0.928378	-1.48314	3.30222	-2.52845	3.77375	2.85189	-5.68033	-5.80023
17	1.78993	-0.036012	-5.45868	5.22745	0.798781	-1.87748	-3.69768	1.45567	4.95513	1.40635	1.47363	2.61383	0.071691	3.08258	0.817478	-0.0769418
18	-0.102852	0.878652	2.20295	1.49374	0.57861	1.79551	-0.987988	2.21424	5.50024	3.37571	3.39226	2.72789	0.167731	2.58142	-1.7442	0.973211
19	6.19676	0.0949619	-1.25816	2.28099	5.04302	3.3327	-0.206678	-2.41614	7.50024	8.23014	9.03371	1.59674	3.04803	3.73662	1.81735	5.6418
20	3.11854	5.36721	0.238602	0.327967	0.920152	1.25873	1.5426	0.656633	3.0842	0.645995	-3.24463	-6.64914	-1.80171	0.288475	0.830284	0.985855

## Sheet: Supp. Table 6 & Supp. Figure 2b
	TargetCurrentS1SameColorPrevS1	TargetCurrentS1SameColorPrevS2	TargetCurrentS1DiffColorPrevS1	TargetCurrentS1DiffColorPrevS2	TargetCurrentS2SameColorPrevS1	TargetCurrentS2SameColorPrevS2	TargetCurrentS2DiffColorPrevS1	TargetCurrentS2DiffColorPrevS2	NonTargetCurrentS1SameColorPrevS1	NonTargetCurrentS1SameColorPrevS2	NonTargetCurrentS1DiffColorPrevS1	NonTargetCurrentS1DiffColorPrevS2	NonTargetCurrentS2SameColorPrevS1	NonTargetCurrentS2SameColorPrevS2	NonTargetCurrentS2DiffColorPrevS1	NonTargetCurrentS2DiffColorPrevS2
1	2.74009	-5.48844	-2.7693	-0.813405	2.73311	4.6319	-1.64023	-1.02433	4.79698	6.25173	2.73297	1.15159	0.727353	-0.680734	-0.568957	-1.53772
2	0.574859	-3.54304	-2.09878	0.0698342	0.775979	1.19093	2.74824	11.4072	4.24962	2.23276	5.68549	6.24682	1.18876	4.8563	0.991412	1.9071
3	2.69897	-0.172274	2.5326	-0.283337	-0.830775	5.84622	-2.34834	1.82316	9.24366	3.83443	5.58524	0.891515	4.05471	5.18984	3.74875	5.39063
4	1.84649	-2.78527	2.64835	0.898663	2.9152	3.02522	-1.10972	-4.70372	9.4247	6.39775	6.08307	4.10884	-1.7985	-2.25166	-3.15276	0.750518
5	1.85845	-0.93164	0.469655	0.385613	-0.94572	-0.48738	-2.68475	0.774224	2.59371	3.91963	1.74991	1.67322	-1.9822	-0.297747	1.62764	-0.412318
6	1.99712	0.937037	-0.0864624	1.32622	0.205546	-1.21272	2.03241	-3.32019	5.65405	2.84101	6.96022	-1.76387	8.50766	1.75517	3.58673	4.14903
7	1.47158	-3.75404	4.81201	1.39278	1.33501	1.52866	2.5227	3.65421	1.24512	0.475272	-0.0500799	-0.400843	3.27627	4.03351	0.236868	6.65586
8	3.02967	-3.53431	2.81311	1.2833	0.713168	-1.71768	-2.79589	1.85044	9.60699	3.70538	6.50214	3.68763	0.981697	2.67533	4.61101	8.65909
9	2.67738	0.625051	0.285188	-1.38118	-0.0960688	2.49835	3.39517	-0.0969214	5.27175	-1.44664	4.80598	4.14016	3.56033	4.30588	0.863846	0.290683
10	1.61886	0.972174	2.87624	-0.923688	1.77333	-1.37067	0.651756	0.968708	2.45979	2.29556	5.96636	1.88751	-1.06497	4.99849	0.389386	3.79183
11	-2.20338	2.47559	-2.51066	-1.26731	-0.258734	0.664476	0.871021	0.517821	3.10404	3.35609	3.54541	1.69919	-0.0593675	3.51894	1.26039	1.14888
12	1.01058	-0.263835	0.960668	-2.52999	-4.6033	-0.32121	2.25362	3.44323	7.51201	5.27138	7.68738	5.10932	6.68894	2.25002	-0.428422	3.33784
13	-0.186289	-0.248613	-1.95112	-4.33116	-0.662385	4.58121	0.471846	2.13308	5.87502	3.40589	-1.06807	2.42226	1.55026	2.43077	-5.35677	-2.36053
14	-0.430264	-2.55551	-1.92381	-3.07029	1.09198	-1.26237	-3.71482	1.57944	0.907489	-0.847394	1.56449	1.80497	2.78811	2.13722	-0.157686	-1.0947
15	1.56936	4.01818	2.23877	3.311	-0.0857656	1.10226	-2.19712	-3.36718	-0.317771	2.34996	-2.36402	2.59087	4.23044	-1.16206	-1.55429	1.39725
16	3.81195	-3.35487	0.465921	0.525627	0.592695	-0.67738	-2.04309	1.52012	1.47293	3.47658	5.02293	4.06586	1.72777	2.99828	0.805498	3.49223
17	2.35083	4.89282	-1.15558	1.1618	1.34818	-0.355066	-5.11903	-2.13693	-2.29839	0.334138	7.37689	-3.48724	-5.79088	0.0294596	-9.93049	0.701471
18	0.945092	2.93047	3.60944	1.62039	-2.07455	3.34644	5.25876	1.1756	9.7893	8.34359	7.05243	3.93543	8.38629	6.9164	0.336598	2.52271
19	2.12915	-1.00062	2.07281	-0.0742939	1.59587	-0.639543	2.14716	2.93896	0.137471	5.36806	7.89094	7.28539	2.25925	1.0628	3.52506	4.956
20	-0.636069	-2.91048	0.394086	0.17109	-1.89718	0.0817297	0.305199	-0.648016	3.8806	1.74678	1.11734	2.93174	1.10203	1.48709	-0.186781	1.35266
21	-1.06555	2.97	5.39474	4.81812	3.07179	2.09722	1.98504	1.58773	5.76653	0.365934	6.60389	4.19881	1.8846	1.4542	6.10476	3.73994
22	1.87667	-3.38242	5.26798	-2.20088	-1.23934	-1.97235	-7.77657	-2.85374	3.65021	1.25734	7.74255	0.987331	0.134868	4.52449	1.00855	2.04036
23	-0.966547	-4.6274	-1.97522	-1.03237	1.41092	1.59067	0.778774	-2.59763	5.19945	5.30297	0.0684789	-0.607823	2.06953	-0.731614	1.83409	0.0943939
24	-1.3765	-1.82887	1.37505	0.0757708	2.15774	0.0587685	0.2594	1.25825	1.96065	1.92404	5.19729	4.87239	-1.06793	5.13723	4.23712	1.50056
25	3.28476	1.59	0.258785	-0.155153	2.36113	-1.73187	0.100379	-0.660395	4.74534	3.1277	2.65152	-1.19829	-0.276337	0.169993	0.0299855	3.41539
26	1.88346	-1.50633	-0.653391	2.06387	-1.2876	-1.80793	0.136245	-1.44947	4.51132	6.72801	5.13202	6.15233	1.87015	-1.19923	5.43061	2.43445
27	1.33813	3.14568	-2.65847	0.55667	2.26914	4.87278	4.98734	2.61924	1.3805	0.854063	0.948297	-1.65579	-0.605829	8.40354	-0.579583	4.27727
28	1.81274	-0.519631	1.38918	-2.70647	-0.234497	-3.90912	-2.01609	-1.25093	3.05684	3.74917	3.66156	2.60205	3.77346	3.59378	-0.166197	3.30747
29	1.45492	-1.66502	0.532249	-0.0565083	-0.763361	2.40501	-1.78062	-1.90406	2.61854	0.266209	1.74623	3.02501	1.19582	3.61119	1.27272	0.896991
30	-1.45205	-0.62446	2.71773	4.87537	0.437521	-1.04377	0.154139	3.00816	0.496765	3.2825	0.679594	-2.91009	-0.840965	2.58798	-1.1358	-2.37793
31	0.21011	1.50239	-0.0743138	2.296	1.81692	-0.115009	-0.25917	1.20408	3.22589	5.82471	4.51759	3.79332	3.37501	2.16462	4.27756	0.86299
32	0.654506	0.878734	0.375438	-2.1349	-2.36555	-0.580045	1.17744	2.14522	5.43042	4.70031	2.00642	4.73635	3.90324	1.15834	1.18873	4.50756
33	0.805551	-0.384746	-2.39279	1.13423	-0.0242586	2.4902	-0.740496	2.70175	7.23481	4.02778	7.88515	1.86968	2.95038	3.02136	2.98892	4.76793
34	0.679722	-1.62103	2.1976	-2.14227	-3.16146	1.42243	-0.0670146	-0.0479605	1.02172	4.23441	0.432608	5.69097	1.07012	-2.12947	-1.644	1.57141
35	-0.491472	-5.5496	3.3967	-1.57935	-0.149181	-2.02273	-2.75697	1.60539	-0.0683267	-3.82462	2.86248	-1.09889	0.166869	0.438556	2.47237	1.33789
36	6.06048	-1.03116	2.30555	-2.85017	-2.52395	0.236209	-0.401204	-0.885493	1.26627	4.12073	2.6221	2.47357	1.4032	1.11793	0.788361	-1.12862
37	0.299238	-0.987864	-1.55769	-1.64892	0.948358	1.04624	-2.47848	-4.74512	0.339795	-1.36302	-1.3026	-2.82481	-0.973043	4.09848	1.60592	-2.22353
38	1.37361	3.04056	-0.547456	-2.98947	2.18135	2.23461	-2.83775	3.10059	7.44034	3.68646	1.26255	7.85189	4.6126	5.57416	1.88164	0.180355
39	0.778057	-3.90517	7.3708	-1.25457	0.296936	3.5686	-1.43579	0.946844	3.36399	0.901366	8.09083	9.57922	2.13747	3.3191	4.53567	6.76654
40	-0.404021	-3.00998	-5.73866	-4.62254	-0.497016	1.86867	-1.2184	3.89466	6.3361	1.42749	4.67699	2.48179	-1.78069	5.97945	1.17802	8.28272
41	-3.33661	0.435623	0.124196	-2.24147	3.53857	-4.03147	-0.680182	-2.72631	4.50973	2.17176	1.02923	1.88449	3.39561	2.04864	-0.0347346	-1.26647
42	1.39048	4.90337	0.447934	3.58978	-1.8675	1.60841	-2.60932	4.03713	10.434	4.01705	6.98288	1.06379	1.07476	3.02908	7.13493	3.43745
43	-0.407623	1.63934	1.83245	0.946127	2.96797	2.49587	-2.75847	-0.191486	7.33644	5.95236	4.47557	3.89005	2.59757	4.53362	0.665642	0.40026
44	3.4925	-0.424375	1.32855	-1.34134	-0.416989	3.28985	-3.34509	-0.349972	0.944858	4.50383	-0.539642	3.32539	4.74942	1.55725	2.42368	2.10105
45	-4.53277	1.13199	-0.984158	0.976657	-1.09416	-2.0311	1.23105	2.92534	5.22176	3.87045	9.8822	16.745	-1.74155	1.11352	2.89244	3.44779
46	3.27034	-5.05108	0.584884	2.03223	-1.9156	-5.49389	-3.32381	4.14669	5.14288	5.20449	8.16562	2.99237	-0.189701	1.57624	-1.42633	0.357787
47	3.02823	-2.22296	-2.33107	0.787111	1.42039	-0.692161	-0.691738	1.18704	1.6404	-0.0205863	0.626011	-2.76154	3.05462	-0.0478135	0.745173	3.05192
48	-4.06606	1.09061	-0.723415	-2.21051	1.87446	2.29897	-5.93276	0.450314	2.69168	-0.125709	1.17582	1.90819	0.482704	3.00971	-0.543618	1.14175
49	2.51687	-6.54406	3.35714	1.66428	-0.801831	-0.0922791	4.37801	0.0588346	8.0974	9.26595	-0.883425	1.75655	0.392083	1.26532	1.45132	3.14053

[truncated: 2 more sheets: Figure S3a, Figure S3b]
